# Supplementary material for: Vibrational circular dichroism and single crystal X-Ray diffraction analyses of [Ir(bzq)2(phen)]+ (bzq = benzo[h]quinoline; phen = 1,10-phenanthroline): absolute configuration and role of CH–π interaction in molecular packing
Source: Royal Society of Chemistry journal article supplement (doi:10.1039/c7dt00606c), 2017-01-01
Supplement: c7dt00606c1.pdf [file c7dt00606c1.pdf]

## Supplementary Information

for

### Vibrational Circular Dichroism and Single Crystal X-Ray Diffraction Analyses of $[\text{Ir}(\text{bzq})_2(\text{phen})]^+$ (bzq = benzo[h]quinoline; phen = 1,10-phenanthroline): Absolute Configuration and Role of CH- $\pi$ Interaction in Molecular Packing

Kazuyoshi Takimoto,<sup>a</sup> Yutaka Watanabe,<sup>a</sup> Shigeki Mori,<sup>b</sup> and Hisako Sato<sup>a\*</sup>

<sup>a</sup> Department of Chemistry, Graduate School of Science and Engineering, Ehime University, Matsuyama 790-8577, Japan

<sup>b</sup> Advanced Research Support Center, Ehime University, Matsuyama 790-8577, Japan

#### Contents:

1.  $^1\text{H}$  NMR,  $^{13}\text{C}$  NMR, MS data and elemental analysis of  $[\text{Ir}(\text{bzq})_2(\text{phen})]\text{ClO}_4$
2. Optical resolution of  $[\text{Ir}(\text{bzq})_2(\text{phen})]\text{ClO}_4$
3. X-Ray analysis of racemic  $[\text{Ir}(\text{bzq})_2(\text{phen})]\text{ClO}_4$  and  $\Delta$ - $[\text{Ir}(\text{bzq})_2(\text{phen})]\text{OCOCF}_3$

### S1. <sup>1</sup>H NMR, <sup>13</sup>C NMR, MS data and elemental analysis of [Ir(bzq)<sub>2</sub>(phen)]ClO<sub>4</sub>

$\delta$ H (500 MHz; CD<sub>3</sub>CN) 6.42 (2H, d,  $J=7.5$  Hz, H7), 7.23 (2H, t,  $J=7.5$  Hz, H8), 7.32 (2H, dd,  $J=8.0$  and 5.0 Hz, H3), 7.58 (2H, d,  $J=7.5$  Hz, H9), 7.75 (2H, dd,  $J=8.5$  and 5.0 Hz, H3'), 7.81 (2H, d,  $J=7.5$  Hz, H5), 7.87 (2H, dd,  $J=5.0$  and 1.0 Hz, H4), 7.96 (2H, d,  $J=7.5$  Hz, H6), 8.26 (2H, s, H5'), 8.27 (2H, dd,  $J=5.0$  and 1.0 Hz, H4'), 8.38 (2H, dd,  $J=8.0$  and 1.0 Hz, H2), 8.68 (2H, dd,  $J=8.0$  and 1.0 Hz, H2');  $\delta$ C (125 Hz, CD<sub>3</sub>CN) 121.5 (C9), 123.2 (C3), 125.1 (C5), 127.6 (C3'), 128.2 (C4a), 129.2 (C5'), 130.0 (C7), 130.6 (C6), 130.7 (C8), 132.6 (C4'a), 135.3 (C6a), 138.3 (C2), 139.5 (C2'), 141.8 (C10a), 147.5 (C1a), 148.2 (C1'a), 149.8 (C4), 152.7 (C4'), 158.0 (C10); LRMS(FAB<sup>+</sup>, 3-NBA),  $m/z = 729$  (M+1); Anal. Found: C, 54.21; H, 3.46; N, 6.80. Calc. for IrC<sub>38</sub>H<sub>24</sub>N<sub>4</sub>ClO<sub>4</sub>·H<sub>2</sub>O ([Ir(bzq)<sub>2</sub>(phen)]ClO<sub>4</sub>): C, 53.93; H, 3.10; N, 6.62 %.

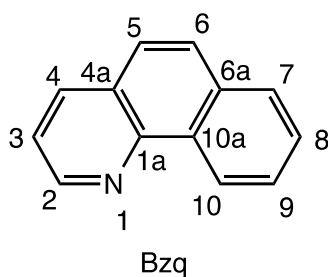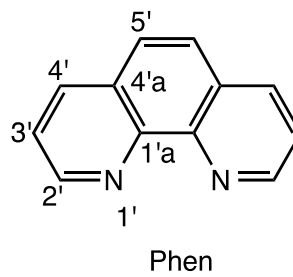

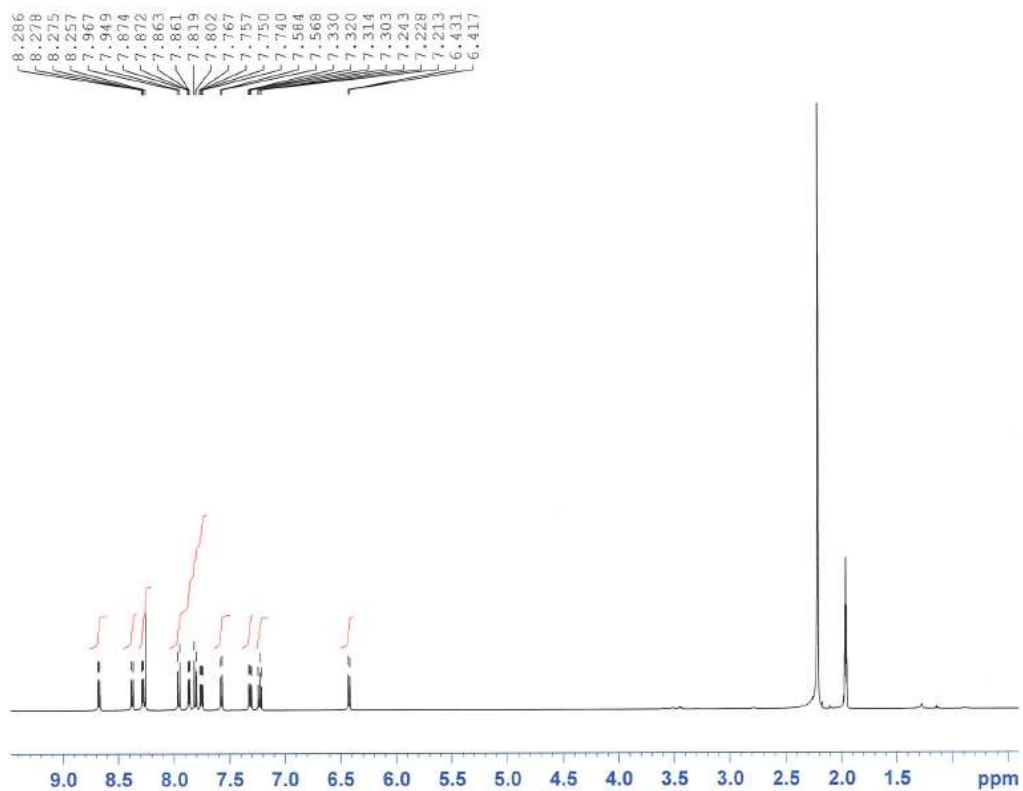

**Figure S1-1**  $^1\text{H}$  NMR spectrum of  $[\text{Ir}(\text{bzq})_2(\text{phen})]\text{ClO}_4$  in  $\text{CD}_3\text{CN}$ .

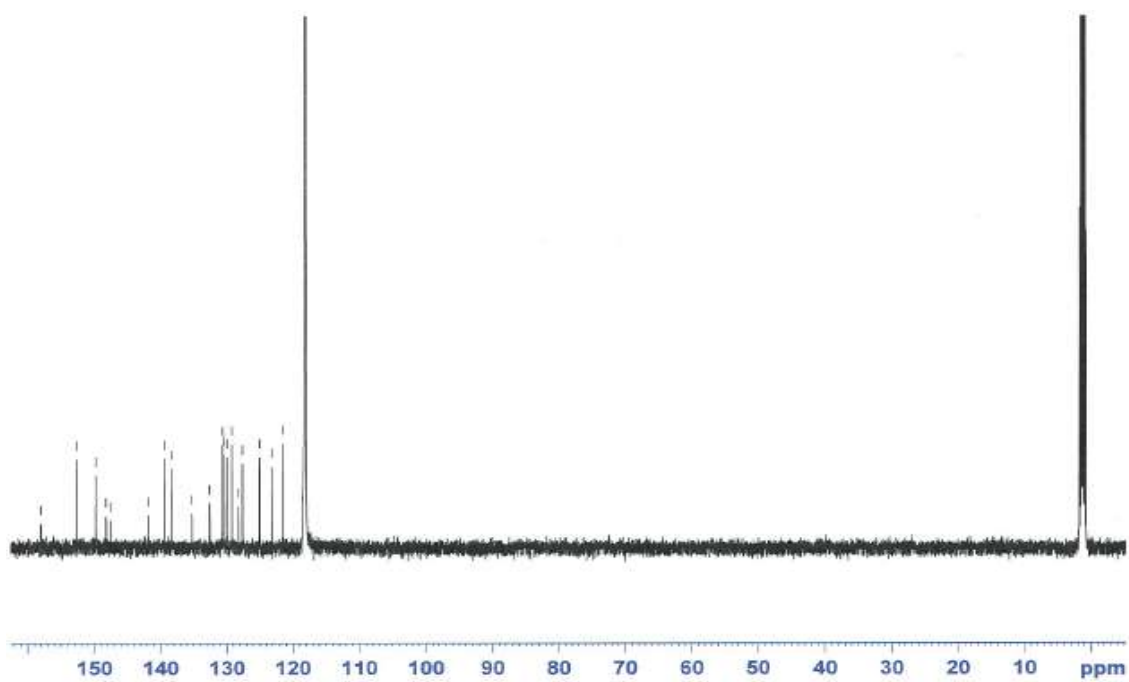

**Figure S1-2**  $^{13}\text{C}$  NMR spectrum of  $[\text{Ir}(\text{bzq})_2(\text{phen})]\text{ClO}_4$  in  $\text{CD}_3\text{CN}$ .

## S2. Optical resolution of $[\text{Ir}(\text{bzq})_2(\text{phen})]\text{ClO}_4$

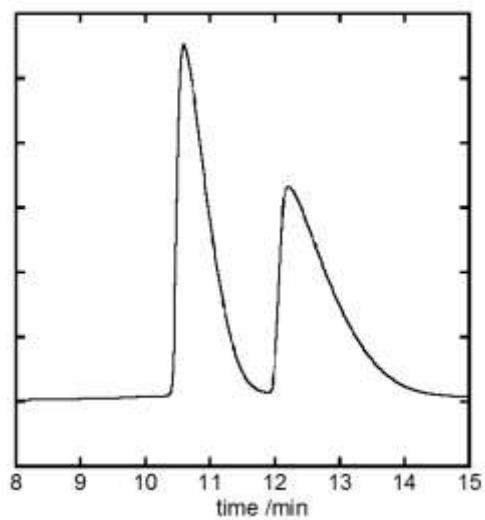

**Figure S2** Chromatogram for optical resolution of  $[\text{Ir}(\text{bzq})_2(\text{phen})]\text{ClO}_4$ . An eluting solvent was  $\text{CH}_3\text{CN}/\text{CF}_3\text{COOH}/\text{NH}(\text{CH}_2\text{CH}_3)_2 = 100/0.1/0.1$  (V/V/V). A flow rate was  $2.5 \text{ mLmin}^{-1}$  and the monitoring wavelength was 430 nm. The used column was a CHIRALPACK IA (Daicel, Japan).

S3. X-Ray analysis of racemic  $[\text{Ir}(\text{bzq})_2(\text{phen})]\text{ClO}_4$  and

$\Delta$ - $[\text{Ir}(\text{bzq})_2(\text{phen})]\text{OCOFC}_3$

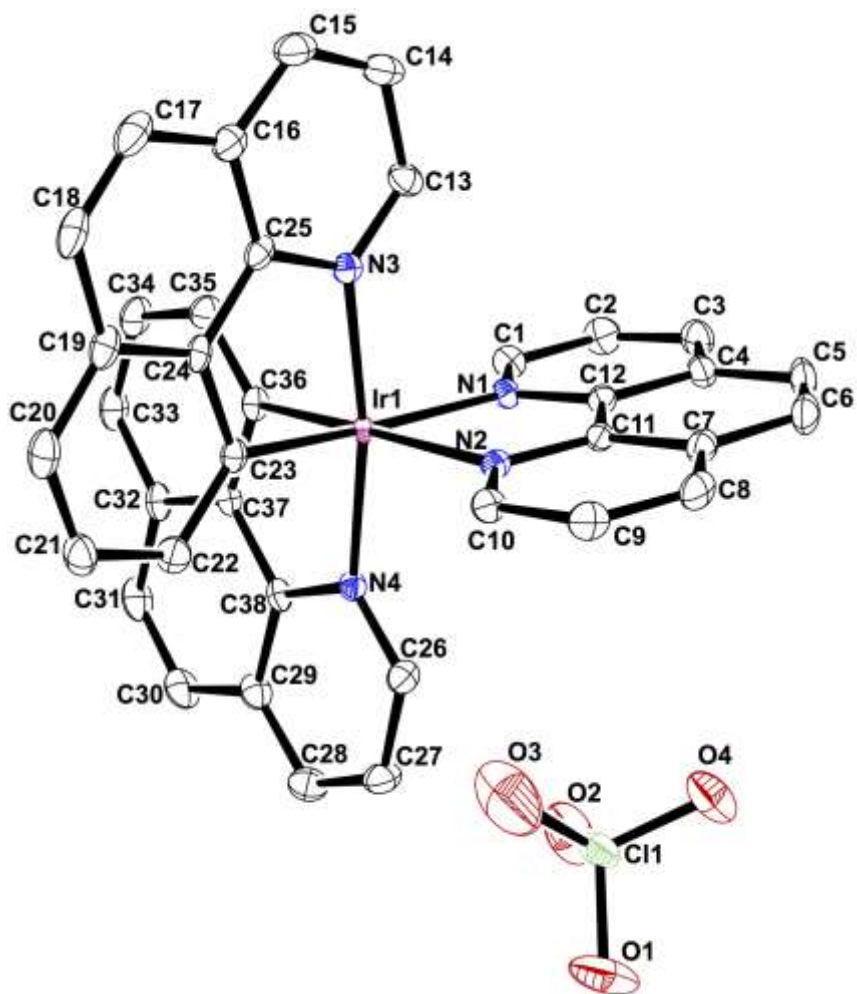

**Figure S3-1** An ORTEP drawing of racemic  $[\text{Ir}(\text{bzq})_2(\text{phen})]^+\text{ClO}_4^-$  with a numbering scheme of atoms. The thermal ellipsoids are scaled to the 50% probability level. Hydrogen atoms and solvent molecules are omitted for clarity.

**Table S3-1** Selected bond distances (Å) and angles (deg) of racemic [Ir(bzq)<sub>2</sub>(phen)]·ClO<sub>4</sub>.

---

| <u>Distances (Å)</u> |          |           |          |
|----------------------|----------|-----------|----------|
| Ir1 – N1             | 2.144(2) | Ir1 – N2  | 2.143(2) |
| Ir1 – N3             | 2.061(2) | Ir1 – N4  | 2.054(2) |
| Ir1 – C23            | 2.017(3) | Ir1 – C36 | 2.017(2) |

---

| <u>Angles (deg)</u> |           |                |           |
|---------------------|-----------|----------------|-----------|
| N1 – Ir1 – N2       | 77.84(8)  | N1 – Ir1 – N3  | 93.40(9)  |
| N1 – Ir1 – N4       | 93.91(8)  | N1 – Ir1 – C23 | 171.71(8) |
| N1 – Ir1 – C36      | 97.84(9)  | N2 – Ir1 – N3  | 91.08(8)  |
| N2 – Ir1 – N4       | 95.81(8)  | N2 – Ir1 – C23 | 95.64(9)  |
| N2 – Ir1 – C36      | 174.84(9) | N3 – Ir1 – N4  | 170.87(8) |
| N3 – Ir1 – C23      | 81.52(10) | N3 – Ir1 – C36 | 92.00(9)  |
| N4 – Ir1 – C23      | 91.82(10) | N4 – Ir1 – C36 | 81.58(10) |
| C23 – Ir1 – C36     | 88.91(10) |                |           |

---

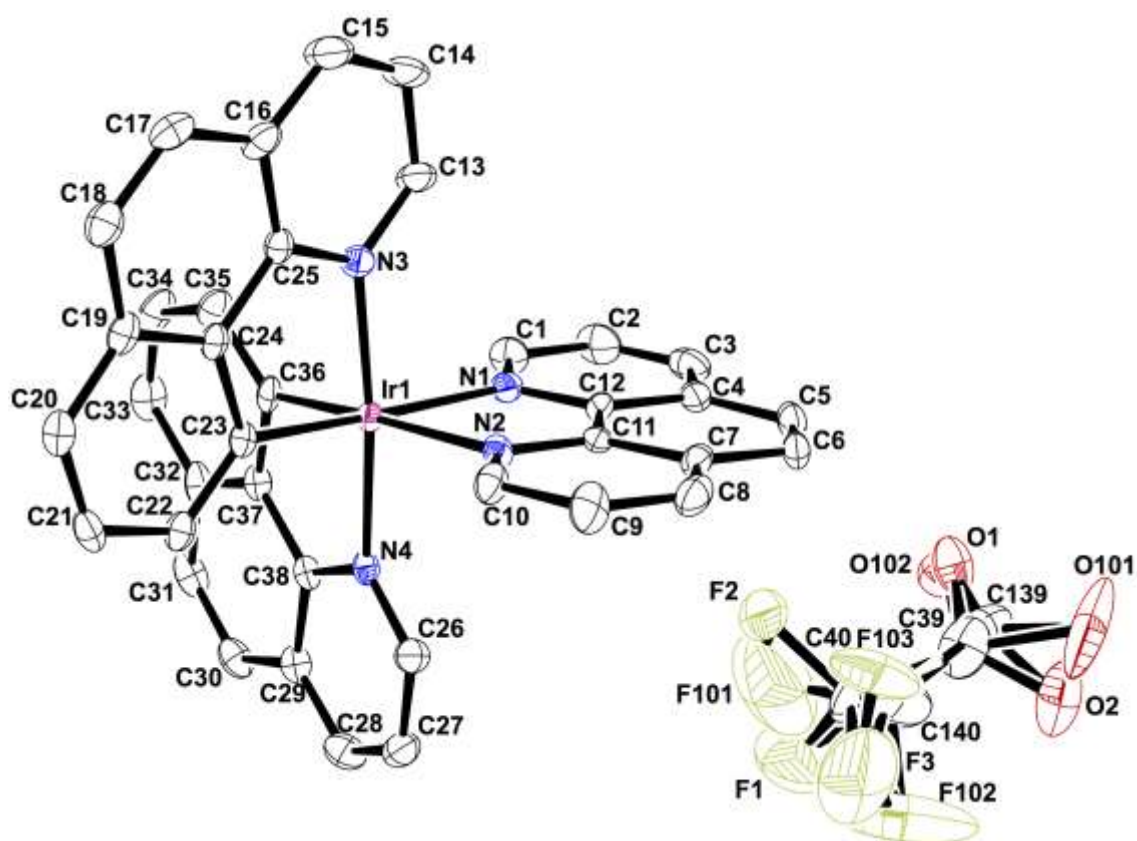

**Figure S3-2** An ORTEP drawing of  $\Delta$ -[Ir(bzq)<sub>2</sub>(phen)]·OCOCF<sub>3</sub> with a numbering scheme of atoms. The thermal ellipsoids are scaled to the 50% probability level. Hydrogen atoms and solvent molecules are omitted for clarity. The counter anion of trifluoroacetate was disordered over two positions with an occupancy ratio of 0.505(10) : 0.495(10).

**Table S3-2** Selected bond distances (Å) and angles (deg) of  $\Delta$ -[Ir(bzq)<sub>2</sub>(phen)]·OCOCF<sub>3</sub>.

| <u>Distances (Å)</u> |          |           |          |
|----------------------|----------|-----------|----------|
| Ir1 – N1             | 2.141(5) | Ir1 – N2  | 2.139(5) |
| Ir1 – N3             | 2.055(5) | Ir1 – N4  | 2.070(5) |
| Ir1 – C23            | 2.020(5) | Ir1 – C36 | 2.019(6) |

  

| <u>Angles (deg)</u> |           |                |            |
|---------------------|-----------|----------------|------------|
| N1 – Ir1 – N2       | 77.91(18) | N1 – Ir1 – N3  | 95.00(19)  |
| N1 – Ir1 – N4       | 89.44(18) | N1 – Ir1 – C23 | 173.57(19) |
| N1 – Ir1 – C36      | 95.8(2)   | N2 – Ir1 – N3  | 90.13(18)  |
| N2 – Ir1 – N4       | 94.03(18) | N2 – Ir1 – C23 | 96.81(19)  |
| N2 – Ir1 – C36      | 172.2(2)  | N3 – Ir1 – N4  | 174.48(19) |
| N3 – Ir1 – C23      | 81.2(2)   | N3 – Ir1 – C36 | 95.0(2)    |
| N4 – Ir1 – C23      | 94.6(2)   | N4 – Ir1 – C36 | 81.3(2)    |
| C23 – Ir1 – C36     | 89.8(2)   |                |            |
